# Supplementary material for: Pro-Apoptotic and Anti-Cancer Activity of the Vernonanthura Nudiflora Hydroethanolic Extract
Source: MDPI journal article supplement (doi:10.3390/cancers15051627), 2023-03-06
Supplement: s1 [file s1]

## Supplementary data

Regarding *Vernonanthura nudiflora*, according to our records, it has not been mentioned in any pharmacopoeia up to now. A certain combination of compounds belonging to it are responsible for the effects that will be seen below, so this extract has the potential to become a phytomedicine.

**Table S1. Antibodies used in this study**

Antibodies against the indicated protein, their catalogue number, source, and the dilutions used in immunoblotting (WB) and immunofluorescence (IF) experiments are listed.

| Antibody                              | Source and Cat. No.                          | WB       | IF    |
|---------------------------------------|----------------------------------------------|----------|-------|
| Rabbit polyclonal anti-VDAC1          | Abcam, Cambridge, UK, ab15895                | 1:5000   | 1:500 |
| Rabbit monoclonal anti-HK-I           | Abcam, Cambridge, UK, ab150423               | -        | 1:750 |
| Rabbit monoclonal anti-Nestin         | Abcam, Cambridge, UK, ab105389               | -        | 1:750 |
| Rabbit monoclonal anti-Glut-1         | Abcam, Cambridge, UK, ab115730               | -        | 1:750 |
| Mouse monoclonal anti-SOX2            | Abcam, Cambridge, UK, ab171380               | -        | 1:200 |
| Anti- $\alpha$ -SMA                   | Abcam, Cambridge, UK, ab5694                 | -        | 1:750 |
| Anti-CD31                             | Abcam, Cambridge, UK, ab28364                | -        | 1:750 |
| Mouse monoclonal anti-GAPDH           | Abcam, Cambridge, UK, ab9484                 | -        | 1:750 |
| Mouse monoclonal anti-Ki-67           | Biolegend, San Diego, California, US, 350502 | -        | 1:750 |
| Donkey anti-mouse-Alexa fluor 488     | Abcam, Cambridge, UK, ab150109               | -        | 1:750 |
| Goat anti-rabbit IgG-Alexa fluor 555  | Abcam, Cambridge, UK, ab150086               | -        | 1:850 |
| Goat anti-rabbit Alexa fluor 488      | Abcam, Cambridge, UK, -ab150078              | -        | 1:750 |
| Goat anti-mouse Alexa fluor 555       | Abcam, Cambridge, UK, ab150114               | -        | 1:750 |
| Goat anti-rabbit-HRP                  | Promega, Wisconsin W4018                     | 1:15,000 | -     |
| Donkey anti-mouse-HRP                 | Abcam, Cambridge, UK, ab98799                | 1:10,000 | -     |
| Mouse monoclonal anti- $\beta$ -actin | Millipore, Billerica, MA, MAB1501            | 1:40,000 | -     |

**Table S2. The compounds identified in plant extracts – Vern, Bac, Pla using GC-MS analysis**

GC-MS analyses of the hydroethanolic extracts of the plants Ver, Bac and Pla were carried out using: a 7890B Mass-Detector; 5977A, Agilent Technologies; Column 5MS UI. The compounds were identified using Library Name W 10N 14L (NIST MS Search 2.2). The various names presenting each compound, the quality of identification (maximum is 100%), and the peak area (Ab\*s) are given.

| GC/MS identified compounds                                                                                                                                                                                                                                        |                                                                                                                                             |                                                                                                             |
|-------------------------------------------------------------------------------------------------------------------------------------------------------------------------------------------------------------------------------------------------------------------|---------------------------------------------------------------------------------------------------------------------------------------------|-------------------------------------------------------------------------------------------------------------|
| Plant Vern Extract                                                                                                                                                                                                                                                | Plant Bac Extract                                                                                                                           | Plant Extract Pla                                                                                           |
| <b>1)</b> Hexadecanoic acid ethyl ester (Peak 1) Area (Ab*s)=33,110,310 Quality=99<br><u>Other names:</u> Palmitic acid, ethyl ester; Ethyl hexadecanoate; Ethyl palmitate; Ethyl n-hexadecanoate; Ethyl hexadecanoate                                            | <b>1)</b> Hexadecanoic acid, ethyl ester (Peak 26) Area (Ab*s)=10,220,250 Quality=99                                                        | <b>1)</b> Hexadecanoic acid, ethyl ester (Peak 7) Area (Ab*s)= 50,748,144 Quality=99                        |
| <b>2)</b> Phytol (Peak 2) Area (Ab*s)=13,850,839 Quality=99                                                                                                                                                                                                       | <b>2)</b> Phytol (Peak 29) Area (Ab*s)=3,989,191 Quality=93                                                                                 | <b>2)</b> Phytol (Peak 8) Area (Ab*s)=18,787,619 Quality=96                                                 |
| <b>3)</b> Linoleic acid ethyl ester (Peak 3)  ETHYL (9z,12z)- 9,12-Octadecadienoate (Ab*s)=20,555,645 Quality=99                                                                                                                                                  | <b>3)</b> Linoleic acid ethyl ester 9,12- <u>Other names:</u> Octadecadienoic acid, ethyl ester (Peak 30) Area (Ab*s)= 5,514,452 Quality=99 | <b>3)</b> Linoleic acid ethyl ester (Peak 11) Area (Ab*s)= 30,507,168 Quality=99                            |
| <b>4)</b> 9,12,15-Octadecatrienoic acid ethyl ester, (Z,Z,Z)- (Peak 4) (Ab*s)=23,074,287 Quality=99<br><u>Other names:</u> Linolenic acid, ethyl ester; Ethyl cis,cis,cis-9,12,15-octadecatrienoate; Ethyl linolenate; Ethyl $\alpha$ -linolenate; Ethyl (Z,Z,Z)- | <b>4)</b> 9,12,15-Octadecatrienoic acid, ethyl ester, (Z,Z,Z)- (Peak 31) Area (Ab*s)= 5,710,334 Quality=99                                  | <b>4)</b> 9,12,15-Octadecatrienoic acid, ethyl ester, (Z,Z,Z)- (Peak 12) Area (Ab*s)= 63,412,281 Quality=99 |

|                                                                                                                                                                                                                                                                                                                                                                                                                                                                                   |                                                                                                                                                                                         |                                                                                                                                                                                                                                                                           |
|-----------------------------------------------------------------------------------------------------------------------------------------------------------------------------------------------------------------------------------------------------------------------------------------------------------------------------------------------------------------------------------------------------------------------------------------------------------------------------------|-----------------------------------------------------------------------------------------------------------------------------------------------------------------------------------------|---------------------------------------------------------------------------------------------------------------------------------------------------------------------------------------------------------------------------------------------------------------------------|
| 9,12,15-octadecatrienoate; 9,12,15-Octadecatrienoic acid, ethyl ester, (9Z,12Z,15Z)-; ethyl (9Z,12Z,15Z)-9,12,15-octadecatrienoate                                                                                                                                                                                                                                                                                                                                                |                                                                                                                                                                                         |                                                                                                                                                                                                                                                                           |
| <b>5) Octadecanoic acid ethyl ester (Peak 5)</b><br>(Ab*s)=3,107,973 Quality=99<br><u>Other names:</u> Stearic acid, ethyl ester; Ethyl n-octadecanoate; Ethyl octadecanoate; Ethyl stearate; Radia 7185; Ethyl ocatadecanoate; Ethyl octadecanoate (Ethyl stearate)                                                                                                                                                                                                              | <b>5) Benzene, 1-methoxy-2-(1-methylethenyl)-</b>                                                                                                                                       | <b>5) Octadecanoic acid, ethyl ester (Peak 13) Area (Ab*s)= 4,630,724,Quality=99</b><br><u>Other names:</u> Stearic acid, ethyl ester; Ethyl n-octadecanoate; Ethyl octadecanoate; Ethyl stearate; Radia 7185; Ethyl ocatadecanoate; Ethyl octadecanoate (Ethyl stearate) |
| <b>6) 1,2- Benzenedicarboxylic acid, bit (2-ethylhexyl) ester (Peak 6)</b><br><u>Other names:</u> Phthalic acid, diisobutyl ester; Diisobutyl phthalate; Hexaplas M/1B; Isobutyl phthalate; Palatinol IC; DIBP; Diisobutylester kyseliny ftalove; Kodaflex DIBP; 1,2-Benzenedicarboxylic acid, di(2-methylpropyl) ester; 1,2-Benzenedicarboxylic acid, 1,2-bis(2-methylpropyl) ester; Bis(2-methylpropyl) phthalate; NSC 15316; Isobutyl-o-phthalate; di-2-methylpropyl phthalate | <b>6) 4H -Pyran-4-one, 2,3-dihydro-3,5-dihydroxy-6-methyl- (Peak 3) ) Area (Ab*s)= 24,981,669 Quality=96</b>                                                                            | <b>6) 4H-Pyran-4-one, 2,3-dihydro-3,5-dihydroxy-6-methyl- (Peak 2) ) Area (Ab*s)= 27,382,476 Quality=95</b>                                                                                                                                                               |
| <b>7) 2,5 Dimethyldiphenylsulfone</b><br><u>Other names:</u> Thiophene, 2,5-dihydro-, 1,1-dioxide; 2,5-Dihydrothiophene 1,1-dioxide; 3-Sulfolene; Butadiene sulfone; Sulfolene; NCI-C04557; 2,5-Dihydrothiophene dioxide; Sulfol-3-ene; $\beta$ -Sulfolene; 2,5-Dihydrothiophene S,S-dioxide; NSC 48532; Sulpholene                                                                                                                                                               | <b>7) 2-Methoxy- 4-vinylphenol (Peak 10)</b><br>Area (Ab*s)= 7,305,730<br>Quality=97                                                                                                    | <b>7) 9,12,15-Octadecatrienoic acid, (Z,Z,Z)- (Peak 10) Area (Ab*s)= 47,918,691 Quality=99</b>                                                                                                                                                                            |
| <b>8) Stigmasta-5,22-dien-3-ol (Peak 11) Area (Ab*s)= 11,567,27423.</b>                                                                                                                                                                                                                                                                                                                                                                                                           | <b>8) 4-Methyleneisophorone (peak 6) Area (Ab*s)= 21,458,921 Quality=97</b>                                                                                                             | <b>8) 2-Methoxy-4- vinylphenol (Peak 3) ) Area (Ab*s)= 3,985,200 Quality=94</b>                                                                                                                                                                                           |
| <b>9) OLEAN-12-EN-3-OL(Peak 8) (Ab*s)= 143,738,307 Quality=93</b><br><u>Other names:</u> Beta Amyrin 3-acetate 3,beta.-Acetoxyolean-12-ene Olean-12-en-3-ol, acetate, (3.beta.                                                                                                                                                                                                                                                                                                    | <b>9) 1H-Cycloprop[e]azulen-7-ol, decahydro-1,1,7-trimethyl-4-methylene-, [1aR (1a.alpha., 4a.alpha.,7.beta.,7a.beta.,7b.alpha.)]-(Peak 18) Area (Ab*s)= 13,447,105 Quality=99</b>      | <b>9) 9,12-Octadecadienoic acid (Z,Z)- (Peak 9) Area (Ab*s)=8,205,041 Quality=99</b>                                                                                                                                                                                      |
| <b>10) URS-20(30) -EN- 3-OL</b>                                                                                                                                                                                                                                                                                                                                                                                                                                                   | <b>10) 1,1,4,7 tetramethyldecahydro-1h-cyclopropa[e]azulen-4-OL, (Peak 19) Area (Ab*s)= 60,683,772 Quality=97</b>                                                                       | <b>10) n-Hexadecanoic acid (Peak 6) Area (Ab*s)= 25,158,853 Quality=93</b>                                                                                                                                                                                                |
| <b>11) (3.beta.,21.beta.) -A'- neogammacer-22(29)-en-3-ol (Peak 10) Area (Ab*s)= 59,020,551 Quality=93</b>                                                                                                                                                                                                                                                                                                                                                                        | <b>11) Ledol</b>                                                                                                                                                                        | <b>11) Hexadecanoic acid, 2-hydroxy-1 -(hydroxymethyl) ethyl ester</b>                                                                                                                                                                                                    |
| <b>12) Pentacyclic Triterpene – Alcohol (Peak 11) Area (Ab*s)= 22,398,502 Quality=93</b>                                                                                                                                                                                                                                                                                                                                                                                          | <b>12) 4aH-Cycloprop[e]azulen-4a-ol, decahydro-1,1,4,7-tetramethyl-, [1aR (1a.alpha., 4.beta.,4a.beta., 7.alpha.,7a.beta.,7b.alpha.)]-(Peak 17) Area (Ab*s)= 30,609,427, Quality=99</b> | <b>12)1,3,12- Nonadecatriene</b>                                                                                                                                                                                                                                          |
|                                                                                                                                                                                                                                                                                                                                                                                                                                                                                   | <b>13) 2(10)-Pinene (Peak 2) ) Area (Ab*s)= 5,807,189 Quality=95</b>                                                                                                                    | <b>13) gamma. – Sitosterol (Peak 22) Area (Ab*s)= 35,635,132</b>                                                                                                                                                                                                          |
|                                                                                                                                                                                                                                                                                                                                                                                                                                                                                   | <b>14) Trans-Sinapyl alcohol (Peak 27) Area (Ab*s)= 5,523,775 Quality=96</b>                                                                                                            |                                                                                                                                                                                                                                                                           |
|                                                                                                                                                                                                                                                                                                                                                                                                                                                                                   | <b>15) 2-Naphthalenemethanol, decahydro-alpha,alpha.,4a-trimethyl-8-methylene-, [2R-(2.alpha.,4a.alpha.,8a.beta.)]-(Peak 23) Area (Ab*s)=</b>                                           |                                                                                                                                                                                                                                                                           |

|  |                                                                                                                                                 |  |
|--|-------------------------------------------------------------------------------------------------------------------------------------------------|--|
|  | 26,189,433 Quality=97                                                                                                                           |  |
|  | <b>16)</b> 4-oxo-adamantane-1-carboxylic acid methyl ester<br>Pyrene, 1,2,3,6,7,8-hexahydro-<br>(Peak 28) Area (Ab*s)=<br>28,617,055 Quality=90 |  |
|  | <b>17)</b> 2-Hydroxy-3,5,5-trimethyl-cyclohex-2-enone, (peak 4) Area<br>(Ab*s)= 10,619,964 Quality=96                                           |  |
|  | 18) 3-Cyclohexen-1-ol,5-methylene-6-(1-methylethenyl)-<br>(peak 5) ) Area (Ab*s)=<br>34,153,434 Quality=91                                      |  |
|  | <b>19)</b> (4H)1-Benzopyran-4-one,<br>3,5,6,7-tetrahydroxy-8-methyl-2-phenyl<br>Other names: Platanin                                           |  |
|  | <b>20)</b> Valerena-4,7(11)-diene<br>(peak 15 Area (Ab*s)=<br>6,007,4363 Quality=96                                                             |  |

**Table S3. Vern plant extract cell death activity is stable after heating the extract**

Vern plant extract was incubated 10 min at the indicated temperature and then assayed for cell death induction following 24 h incubation of SH-SY5Y cells with the indicated dilution of the treated extract.

| Tempe. °C | Ver plant extract dilution | Cell death, % |        |       |
|-----------|----------------------------|---------------|--------|-------|
|           |                            | 1:2000        | 1:1000 | 1:500 |
| 4         |                            | 37            | 83     | 98    |
| 45        |                            | -             | 84     | 98    |
| 60        |                            | 40            | 91     | 98    |
| 80        |                            | 57            | 92     | 99    |

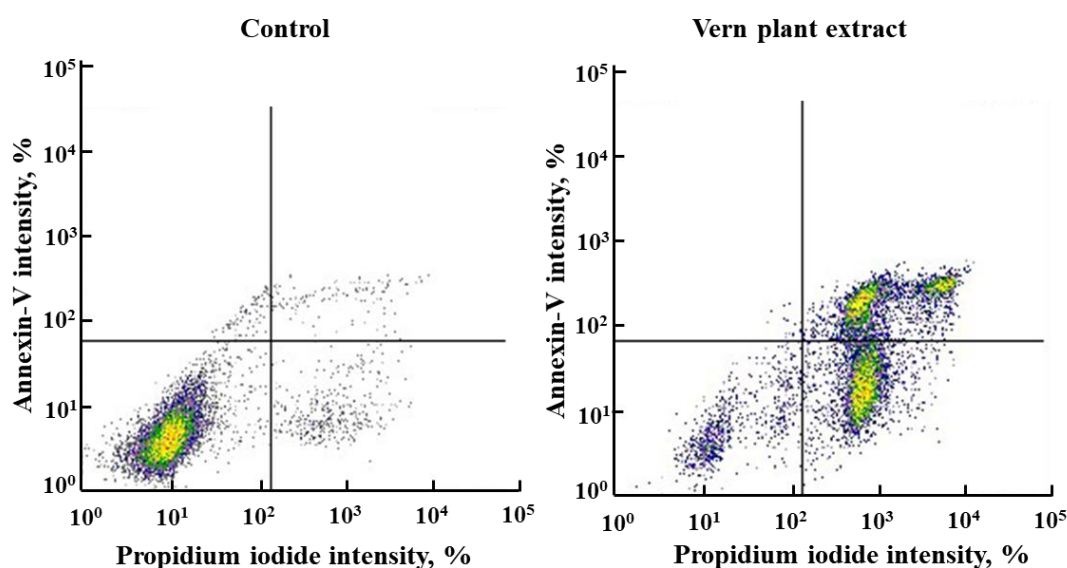

**Figure S1. Apoptosis analysis using Annexin V and PI and FACS analysis**

SH-SY5Y cells were incubated (24 h) with Vern plant extract (1:250), and then analyzed for apoptosis using Annexin V/PI staining and FACS, representative FACS results are shown.

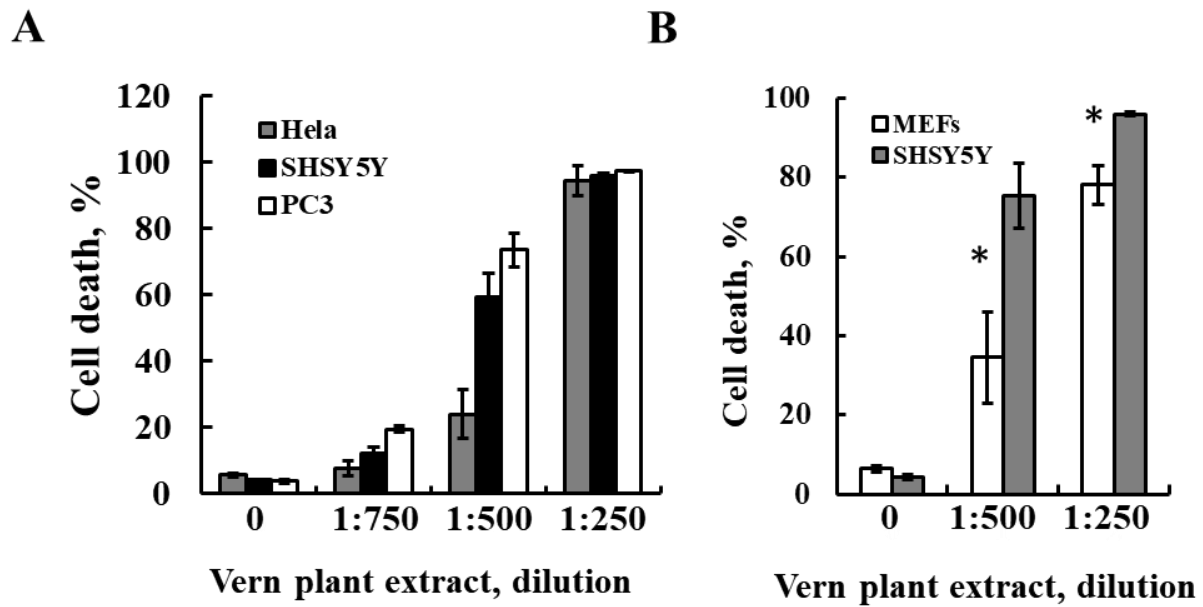

**Figure S2. Vern plant extract effect on different cell lines**

SH-SY5Y, Hela and PC-3 cells (A) or SH-SY5Y and MEFs cells (B) were incubated for 24h with the indicated dilutions of plant Vern extract, and cell death was analyzed by Pi staining and FACS analysis (n=3). Results are means  $\pm$  SEM. \* $P < 0.01$ .

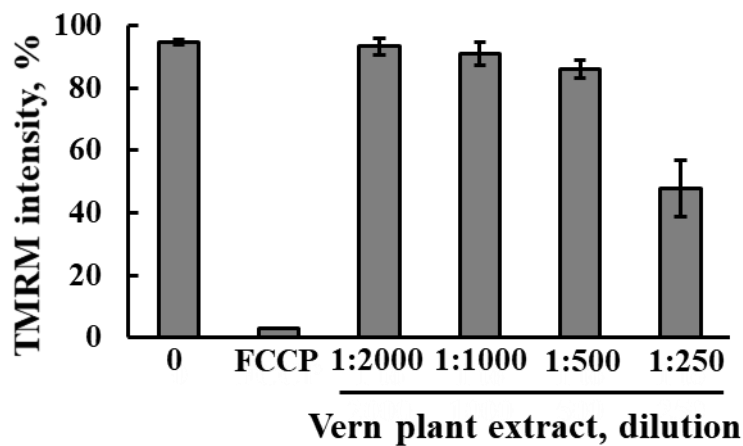

**Figure S3. Vern plant extract effect on mitochondrial membrane potential**

SH-SY5Y cells were incubated for 24h with the indicated dilutions of plant Vern extract, or FCCP (50  $\mu$ M), harvested and incubated with TMRM (400nM, 20min) and analyzed for mitochondrial membrane potential ( $\Delta\Psi$ ) by flow cytometer. Results are present as TMRM fluorescence intensity as a percentage of control (n=3). Results are means  $\pm$  SEM.

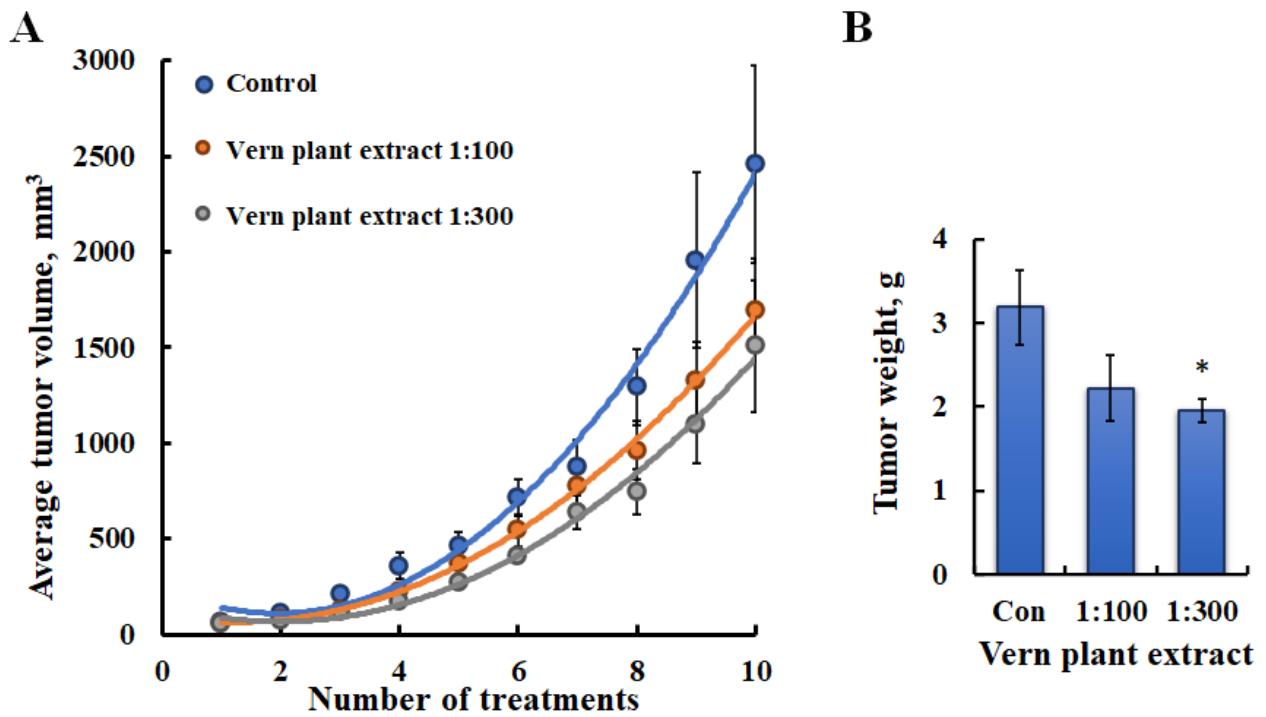

**Figure S4. Inhibition of tumor development by plant A extract in glioblastoma xenograft mouse model**

U-87MG cells ( $1.8 \times 10^6$  cells/mouse) were S.C. inoculated into nude mice. Tumor volume was monitored (using a digital caliper) and on day 14, when the tumor volume was between 40 and 60 mm<sup>3</sup>, the mice were divided into three groups with a similar average volume calculated per group (5 or 6 mice per group). The three mice groups were subjected to the following treatments: control (ethanol to a final concentration 0.14%) or Vern plant extract to a final dilution of 1:100 or 1:300, calculated according to the tumor volume. **(A)** The calculated average tumor volumes as a function of time are presented as means  $\pm$  SEM (n=5 or 6 mice). **(B)** The calculated average tumor weights are presented as means  $\pm$  SEM. \* $P < 0.05$ .
